# Supplementary material for: Comprehensive analysis of peptide-coding genes and initial characterization of an LRR-only microprotein in Marchantia polymorpha
Source: Front Plant Sci. 2023 Jan 19;13:1051017. doi: 10.3389/fpls.2022.1051017 (PMC9901580; doi:10.3389/fpls.2022.1051017)
Supplement: Supplementary file 4 [file Table_3.xlsx]

## Sheet: orthologous genes
### Data were obtained from Dicots PLAZA 5.0.
### Orthologous genes with same gene family IDs (ORTHO05DXXXXXX) as MpSGFs.
SGF ID	gene family ID (PLAZA 5.0)	Species	Gene ID	Locus	Length (aa)	Sequence
SGF6	ORTHO05D000774	Amborella trichopoda	ATR0661G290.1	ATR0661G290	296	MELSDLPQDCLCEILGRTPPSTIGSAAATCRRLAAAARCEATWAILLFPLSSPFLSLPLSCRLLSLSLSSPPLSLPLAPTKREIAHRLTHGVLVDGGKQLYKLSGRTGGFMAALSSSAMNITWGGDSRFWRRESSRSSWFGTVSRLLAVCWFEVRGNWTLWLPHGSYSLLWRIKVLNPHGGRLRFLSWHKPINFWLCLREGREENELILREKLAMAELSPSCYERWFEFKVGEFMVKSSDKMVRLEFGVEELDCSFWKGGLLLDCVAVRPLFCDDQICSDRPEWDFSKARGTPGVF
SGF6	ORTHO05D000774	Amborella trichopoda	ATR0757G168.1	ATR0757G168	304	MGASLSRLTEGDEGPNSIRTGLGDIPESCVASVFMYLSPPEICKLARVNRAFRGAASADFVWESKLPSNYRELWQTLFSECPENLTKQEIYALLCRPVPFDGGSKEVWLEKTTGAVCLTISSRAMSITGIDDRRYWNWIPTDESRFHGVAYLQQIWWFEVDGEVEFCFPEGAYSLFFRVHLGKASKKLGRRVCNFEHIHGWDIKPVRFHLSTSDGQNASRDCYLEESNKNGSEWNKPYSRGAWLKCHVGDFRVNSSDSPTKIKYSMTQIDCTHTKGGLCVDSVFIVPVNLSERRKACSLLERGR
SGF6	ORTHO05D000774	Amborella trichopoda	ATR0820G207.1	ATR0820G207	314	MGATLSSLTENSAGGGGGRPPGLGDIPESCVAGVLKYLTPPEICNLARLNRAFRAASSSDSVWNSKLPPNWQFLLQLLSTPQTQAQAQAQTQAPAPAPAPLTAKKDIFAFLTRPLPFDNGTKLVWLERNTGAVCLSISAKAMCITGIEDRRYWNLLPTEESRFRVVAYLQQIWWFEVDGQLKFRLPAGLYNLSFRVHLGRPSRRLRRRVCNFEHTHGWDLKPVRFELSTADGQQDSCECCLDGHDKDSMGGSARGCWVDYQLAQASGTSISICGGSLSYIVSHLCLQLRDFYASTLFTEVPVMRAAGVPSYYWN
SGF6	ORTHO05D000774	Anthoceros agrestis	AagrBONN_evm.model.Sc2ySwM_114.28.1	AagrBONN_evm.TU.Sc2ySwM_114.28	287	MGDVVALVTDVVRLCKIIAARAQEAKEHKAICDALAGYLGCIEPIHDAVLGLPELADKRHIALSLAQLKKQLERAEELVQSCSQKSMLSLFVFSKKQELKDVEGAIQLYVGTLTAALAISIKYASHPESGAGPSQTPDPHTNTLVSSGQLSAKLMVIVWGDDTRYWEWARRKGSRFEEVAHLKMVCWLGAHGTMSCNLEAGTYTLSWRLHVEHTDLRRSHGWAEKPVIFGFKTSDGQTQERAQNMMLSKHEPNCRHTGNGWRELDVGEFSVPPHVASACPKEQQGIN
SGF6	ORTHO05D000774	Anthoceros agrestis	AagrBONN_evm.model.Sc2ySwM_117.3602.1	AagrBONN_evm.TU.Sc2ySwM_117.3602	328	MVFGWSALGWSFASRIVGLGDDAAWSGFRGRGVFGLGVAYSYEKRFLVDQGQVQDAVVHGSSLGDLPEGCVALILSKTSPKDAARLSTVNRVFTQAGGANIIWDGLLPSANLKALGLDDSIFERFPSRKRLFEHLSQHLFITHPFQGHWLDPATGGVCRAVSARAFSVIWGEEHRYWDWVPKQGSSFPDVAFVKVDYWFKIRGQMQCSLPLGAYTLSFRVQLGPEKPIGYFQRRISKCVKFSFAIGGGGMYQLEKAFCLNFSSPNREVNKLQASYAQPRMADNQWLECEEGLYLDGVVIRPRLRPPAYQPPNMYIPSSPMLGHGTLLT
SGF6	ORTHO05D000774	Anthoceros agrestis	AagrBONN_evm.model.Sc2ySwM_228.227.1	AagrBONN_evm.TU.Sc2ySwM_228.227	337	MVALSPAIRFCIGFHEMQDTGDAVLNPLCLPHGNKAGWGAVATKVTTVDPTDERCGYRRDFGTLTNHRHGDQHPGIRLSNSGKHRRNRARCSALSYVVANADPREGPSSYSSKKDLYHRLCHPVKLNGGNELFWLDRPTGAICRALSARALTVIWGDDPRYWSWIHNPGGSRFEEVAYLENVCWLELRGRLVGYLTPGRYSLSWRVKQRGVEGSPLHRPFRRPFSLALRGPRPVFWDHAGVWELRPVTFRLSTADGQAAESARYLDGEVTLSDKQSALPNLATVTQDEDGWLEYVAGDFIVNSEPVELFFSLTETDGGHWKKGLCFDGVVIRPSLHE
SGF6	ORTHO05D000774	Anthoceros agrestis	AagrBONN_evm.model.Sc2ySwM_228.277.1	AagrBONN_evm.TU.Sc2ySwM_228.277	328	MVFGWSALGWSFASRIVGLGDDAAWSGFRGRGVFGLGVAYSYEKRFLVDQGQVQDAVVHGSSLGDLPEGCVALILSKTSPKDAARLSTVNRVFTQAGGANIIWDGLLPSANLKALGLDDSIFERFPSRKRLFEHLSQHLFITHPFQGHWLDPATGGVCRAVSARAFSVIWGEEHRYWDWVPKQGSSFPDVAFVKVDYWFKIRGQMQCSLPLGAYTLSFRVQLGPEKPIGYFQRRISKCVKFSFAIGGGGMYQLEKAFCLNFSSPNREVNKLQASYAQPRMADNQWLECEEGLYLDGVVIRPRLRPPAYQPPNMYIPSSPMLGHGTLLT
SGF6	ORTHO05D000774	Arabidopsis thaliana	AT1G12710.1	AT1G12710	291	MGVAHSDLHNDLSSSSCFGDRNILKPGLGDLPEACVAIIVENLDPVEICRFSKLNRAFRGASWADCVWESKLPQNYRDVLEKILGGFPENLQKRHLYAFLSRINSFDDATKKVWIDKRTSGVCLSISAKGLSITGIDDRRYWSHIPTDESRFSSVAYLQQIWWFEVDGEIDFPFPVGTYSIFFRLQLGRSGKWFGRRVCNTEQVHGWDIKPVRFQLWTEDGQYSSSQCMLTERGNWIHYHAGDVVVRESNRSSTKIKFSMTQIDCTHTKGGLSLDSVVVYPSSCKDQLKRF
SGF6	ORTHO05D000774	Arabidopsis thaliana	AT1G63090.1	AT1G63090	289	MGSGFSLFQKNLSSCYGDRDLLQPGLGDLPESCVALILQNLDPVEICRFSKLNTAFHGASWADFVWESKLPPDYKLILEKILGSFPDNLRKRDIFTFLSRVNSFDEGNKKAWVDKRTGGLCLCTSAKGLSITGIDDRRYWSHIPSDDSRFASVAYVQQIWWFQVDGEIDFPFPAGTYSVYFRLQLGKPGKRFGWKVVDTEQVHGWNIKPVRFQLSTEDGQHSSSQCMLTEAGNWSHYHAGDFVVGKSKSSSTKIKFSMTQIDCTHTKGGLCVDSVVVYPSSCKDRLMQI
SGF6	ORTHO05D000774	Arabidopsis thaliana	AT3G53000.1	AT3G53000	300	MGSSLSNLNDGTNGLAMGPGLGDIPESCVACVFMYLTPPEICNLAGLNRSFRGAASSDSVWEKKLPENYQDLLDLLPPERYHSLSKKDIFAVLSRPIPFDDDNKEVWIDRVTGRVCMAISARGMSITGIEDRRYWNWIPTEESRFHVVAYLQQIWWFEVDGTVRFHLPPGVYSLSFRIHLGRFTKRLGRRVCHFELTHGWDLKPVRFSLSTSDGQEASCEYYLDDVERNEALGKHKRGYWIEYRVGEFIVNGSEPSTEIQWSMKQIDCTHSKGGLCVDSVFINPIGDVKEHKRKAVLKEA
SGF6	ORTHO05D000774	Arabidopsis thaliana	AT3G61060.1	AT3G61060	290	MGANISGGSPEFDRNDDVYSRKLRLVDLPENCVALIMTRLDPPEICRLARLNRMFRRASSADFIWESKLPANYRVIAHKVFDEITLTKLIKKDLYAKLSQPNLFDDGTKELWIDKNTGRLCLSISSKALRITGIDDRRYWSHIPTDESRFQSAAYVQQIWWFEVGGEFEIQFPSGTYSLFFRIQLGKTSKRLGRRICNSEHIHGWDIKPVRFQLATSDNQQAVSLCYLNNNPGSWSHYHVGDFKVTNPDVSTGIKFSMTQIDCTHTKGGLCIDSVLILPKECAKEVIGSQ
SGF6	ORTHO05D000774	Arabidopsis thaliana	AT5G52120.1	AT5G52120	291	MGAASSSIVRSEPFAGKLCGLEDVPENCITAMFMYMEPPEICLLARVNKSFHRASRSDAVWEDKLPSNYKFLVRRILEDQQQVGVKDKLIYRKKEIYARLCRPNLFDTGTKEAWLDKRSGKVFLAISPKAMKITGIDDRRYWEHISSDESRFGSITYLRQIWWLEAVGKIRFEFAPGKYSLLFKIQLGKPIRKCGRKTCSLDQVHGWDIKPVRFQLSTSDGQCAMSERHLDESGRWVYHHAGDFVVENQNSPVWVKFSMLQIDCTHTKGGLCLDCVIICPFEYRGKYKYSD
SGF6	ORTHO05D000774	Arabidopsis thaliana	sORF1868	-	123	MAQGEIVPRPSPFDGLPENCISNIISFTTPRDACFAASVSKAFESAVQSDSVWEKFLPLDYSSLVPESRVFLSKKELCFSLCRVPLLIEGGKKSFWLDKTSGEKCIMLSPKGMVISWVNSPQF
SGF6	ORTHO05D000774	Chara braunii	GBG75650	CBR_g20277	522	MRNCNTDNESAALCGHDRPELNRWRACGVGWDTGKLIFPGMDRLSFRKRISGPQQQAASHDEEKGASVDSDSAGDNRVLEDSSEKGVKSISMVARQNSSANNGLPLTSGMSPATTPPSATVSSLPSCSDSVPCVSLSRSRVHSSPASQDEESSPLCHQGEDSCPLSPSRSPVREAGGKSPRPRHARSYSGGIACCRGESVGGDEEEGGVRAADGSSEGNSDFRCRQRDCPIAEGEVWEAVLPVDYEEICRAVYPEPLSCEDKRKVYSLLADGVLLHGGFYSYRLMKRQGSARASASVAMSSSSMSIVWGHDIRHWEEVRCPASMFGRVMVLHRVHWFDVSGRISWHFPPGVYTCAWRLSRMVAPKFIENVATFWGSQPAESFVRTSDGQTVRLWLPLSH…
SGF6	ORTHO05D000774	Marchantia polymorpha	Mp1g08170.1	Mp1g08170	316	MGGVMKPMGTCAPSEVRFDQAACDLQLDGTGFEDLPESCIELVLCFLSPRDIAISACTNRTFRGASLSDVVWHAKLPKDYTEFLAKAKDGACYFDSKKKIFDFLRIKRTLYNHEFWLSRSLGGVCVHQGAEALDVVWGSDERYWDWRQQPGSRYDKSAYLKAVCWLDVKGSMECSLPVGTYTLSWRFALEQDAFGFTRHDPYGFTGHEGTWPIEFAMSVNDHKTVQKESFLRDGQFSSEGEHSSDDEDREEVDTDWKNFYVGDFSVEEGDKDSRIGRVKLQYSLVETRGGNWKSGLWLDGVVIMPKQQKSIGCVMP
SGF6	ORTHO05D000774	Marchantia polymorpha	Mp1g08180.1	Mp1g08180	372	MPWYCCWRTPRRRPMGGVMKPMGTCAPSELRFDQAACDLQLDSMKPMGTCAPSKLRFDQAACDLQLDGTGFEDLPESCIELVLCFLSPRDIAISACTNRTFRGASLSDVVWHAKLPKDYTEFLAKAKDGACYFDSKKKIFDFLRSKVTLHNHEFYWLSRSLGGVCVRQGAEALDFVPGPYKPHDRLQRLDWLQRPGSRYDKSAFLKQVVMLHVKGSMECSLPVGTYTLSWRFALEQRAYGFTRDITRETWPIEFEMSVNDHETVQKLSFLRDVQSSSEGEHSSDDEDREEVDTDWKNVYVGDISVEEGEKDSRIGRVKLQYSLAELGGGRWKSGLWLDGVVIMPKQHNAVATRNGIEWNRTNSGWIEQGVDG
SGF6	ORTHO05D000774	Marchantia polymorpha	Mp1g08200.1	Mp1g08200	309	MVCHLQMRSCAPSELRFDPMVGDLQLDPTGFEDLPRSCIALVLCFLSPRDIAISACANRAFRGVSLSDVVWQAMLPKDYNEVLAKAKDGARAFDSKKQIFDYLCSKVLLQNHEFYWLSRSLGGVCRSQGAEALDVVWGSDDRYWDWLQRSGSSYDKSAYLKAVCWLHVKGSMECSLPVGKYTLSWRFALEQNEYGFTRRGGIWPLEFSMSVNDHETVKSFQTYLRDGQSSYEGEHSSDDEDRDEVDTDWKEFHVGDFSVEEGEKDSRIGRVKLQYSLVETRGGIYKSGLWLDGVVIMPKQKRSLSTFLW
SGF6	ORTHO05D000774	Marchantia polymorpha	Mp1g08220.1	Mp1g08220	326	MGGVLKPMCTSASSELKFDPAACDLQLDGTGFEDLPESCIALVLSFLSPKDIAMSACTNRALRDASLSDFVWQPKLPKGYTEVLAKAKDGARAFDSKKQIFDYLCSKVPLHGHEFYWLSRSLAGVCRSQGAEALDVVWGSDKRYWHWRKRRGSSYDKSAYLQQVCWLSVKGSMECFLPVGTYTFSWRLAFQDDYGFTRRGGDWPIEFTMSVNDHETVQRKIFLRDGQSSSEGEHSSDDEDHTDWNELYVGDFTVDEGEKDSGIGRVKLQYSLVEIKGGHWKSGLWLDGVVIMPKQQGMDWLRHAIATGNGIEQGMDGWRRDYIEAE
SGF6	ORTHO05D000774	Marchantia polymorpha	Mp1g08250.1	Mp1g08250	325	MDGVMKPMSTCAPSEVKFDPGACDLQLGDTGFEDLPESCIAHVLCFLSPRDIAMLACTNRVLRGASLSDVVWQAKLPKDYTEVLAKAKDGARAFDSKKKIFDYLCSKIPLHGHEFYWLLRSPAGVCRGQGAEALDILGGSDREWHWLQRGGSSYDKSAYLNAVCFLSVKGSMECSLPVGTYTLSWRFALDKTSSGFTRGWGKLPIEFAMSVNDHVTVETYGFFPDCQSSSEAKHSSDDEDQEEADTDWNEYYVGDFTVEEGEEDSGMGRVKLDYSLVHTKSRYWKRGLWLDGVVIMPKNWLRYDGVRYAATVMKYCRTRNRWMVS
SGF6	ORTHO05D000774	Marchantia polymorpha	Mp1g08260.1	Mp1g08260	294	MGGVMKPMGNCAESELKFDNAACDLQLSGIGFEELPESCIAHVLCFLSPRDIAISACTNRTFRGASLSDVVWQAKLPRDYTEVLAKAKDGARAFDTKKQIFDYLCSNVPLRGHEFYWLSRSRAVVYRSQGAEALDVVWGSDRRYWHWRNRRGSSYDKSAYLKQVCWLHVKGSMECSLPVGRYTLSWRFALEQSVWGFALPIELAMSVNDHETVHKLVFLKNGQSSSEAEDPSGDEYVEEVDTAWKKLYVGDFSVEEGEKDSGLGRVKLQYSLVETRGGNWKSGLWLDGVVIMPK
SGF6	ORTHO05D000774	Marchantia polymorpha	Mp3g01690.1	Mp3g01690	295	MLLEGAIVAQSSASGGDTMLLEELPEDCIESIISYTSPWYACRLACLNRTLASAVRSDTVWGGMLPSDHALVYPRAAHLSKREIVEALAEGISLDQGRQRYVLLRRSGGICRQLSVAAMSVSWGEDCRFWRWDFSRSSCFSRVAHLLAVCWLEVTGTWKCSLPPGIYSVVWRLKVANPQGGRCQFLSWKKPLSFVVNTSDDQDLEKELDLGQIQTNVFEEWFEFEVGQIVVRGKGREVKQLHLFFSIKEVDCTYWKGGLFLDCLALRPATAQDEPVYTKPSRADWKKMRVRPGVF
SGF6	ORTHO05D000774	Marchantia polymorpha	Mp3g22930.1	Mp3g22930	447	MELLSNANFSTLDTCKLINLIYATAHNARVHRQTCIEFASYLSIINNLLSSLHQSPHFLKHPPVQDALTMLHRTLVNAFLLAQNCERSSTLSSVFRNIPAQFKAFEMEIQKILSILNLPNLHLNWHITYNDTNTVYQAPPERTPATFLTQNQSFPAYGTRHRALPARSSSASPTSGQSLPTFQNIPARSLSITWGEDGRAWQWVSRRGSRFREVAYVAEVRWLEVEGHMSCKLMPGTYRVSWRLQMGSLNNAQPCGWESNPVLFRLFTGDHLQAECATFLDGSSGRTAKSIDCFVRKVADGWLEYDVGTFTSSNPEIPVDLTFSMHELKGSWKSGLFLDGVVIVQVSDLVEDTMVDAGLYSADLSIGLSRVVSFSRHPHDLELMKHPYRYTCNVCKCPE…
SGF6	ORTHO05D000774	Marchantia polymorpha	Mp8g03620.1	Mp8g03620	333	MDGVMKPMSTCAPSELKSDQGACDLQLGDTGIEDLPESCIAHVLCFLSTKDIAISACTNRAFRGASLSDAVWQAKLPKDFTEVLAKAKDGARAFDSKKQIFDYLCSTILLHGHELYRLLESPAGVCRGQGAEALDLGSDGEQWDWLQRGGSSYDKSAYLNASCALNVKGSMECSLPVGTYTLAWRFALDDMSYAFNRGRNKLPVEFAMSVNDHVTVKSYGYFPDLQSLSEATLSSDEEDQEEADIDWNEYYSGEYYSGEYYSGDYYSGDFTGEEGDSHWNTYYVGNFTVEEGEEHSGMGRVKLDYSFVHNRRHYTWKRGLWLDGVVIMPRTVM
SGF6	ORTHO05D000774	Marchantia polymorpha	MpSGF6	Mp2g23830	101	MSACTNRVFRSASLSDVVWQAKLPKDYTEVLMKAKDGARGFDSKKQIFDYLCSKVPLHGHESYWLVRSPLGVCRSQGAEALGIAWGDDNRYWEWHQRGGST
SGF6	ORTHO05D000774	Oryza sativa	Os02t0224900-01	Os02g0224900	237	SAASASFSLLAALSLSLSLSLSHLALACCWSSKPTPFSRPRGNPSPSRASACVRASAADPIRSASPPYVPRPFEVGVPPTSTSAPLSVASRDSAAAASDPSILESDGKCKKPKGKHKVVLLGFSRIKRFHSVAYLQQIWCFEVVGEIDFSFRVLTYSLYFRIHLGRFYKRFGRRACSTEHVHGWDQKPVRFQLSTSDGQHSLSQCSLGEPGSWVLYHAGNFVVSKPDQTIKLKFSMA
SGF6	ORTHO05D000774	Oryza sativa	Os02t0675800-01	Os02g0675800	297	MGSGSSILGADGEWGVTSLGDMPESCVAAVLLYLDPPEICQVARLNRAFRGAASADCVWAGKLPVNYRYLLAFAAAADDEGGDGGHGNGKRSSPSSKKDIFARLCRPTPFDFGNKEFWIDKNKGGICLSISSKAMVITGIDDRRYWSQLATEESRFHHIAYLQQIWWLEVDGELDFCFPAGSYSIFFRLHLGRPYRRMGRRICGTEQVHGWEAKPTRFQLSTSDEQHATSEYYLEQEGSWILYHVGDFVVLNSDELMKLKFSMLQIDCTHTKGGLCVDSVLIYPKGYRHEKANIVHM
SGF6	ORTHO05D000774	Oryza sativa	Os03t0116700-01	Os03g0116700	297	MGAGVSDLAAGMEAVGKVAGGAGLGELPELCAAEVLLHLDAPEICRLARLNRAFRGAAAADFVWEAKLPENYGYLLDFVDGAMEGGGGGRERSVMGKKEVYARLAKAVPFDGGKKELWLEKSKGGVCIALSSKSLVITGIDDRRYWSHMPTTESRFHSVAYLQQIWWFEVVGELEFCFPAGTYSLYFRLHLGKASTRFGRRVCSSEQIHGWDKKPVRFQLSTSDGQHALSQCYLDEPGSWILYHVGDFVASTTEQPIKLKFSLAQIDCTHTKGGLCVDSVLIYPKGFQQEKVISSQK
SGF6	ORTHO05D000774	Oryza sativa	Os04t0571300-01	Os04g0571300	304	MGAGASSMMGPEGYGRGWGQTSLGDMPESCVAAVLLYLDPPEICKVARLNRAFRGAASADCVWAAKLPANYRYLAALAAAADDDSGGDGATEGNGSRCSSAAMIKKEIYARLCRPTPFDGGTKEFWMEKNKGGLCISISSKAMAITGIDDRRYWSHLSTEESRFHHVAYLQQIWWLEVAGEIDFCFPAGSYSLFFRLQLGRPHKYMGRRVYGYESIHGWNIKPTRFQLSTSDDQQATSQYYLNEPGNWILYHVGDFVVSSSDQLTNLKFSMMQIDCTHTKGGLCVDSVFIYPKGHRHEDCTICK
SGF6	ORTHO05D000774	Oryza sativa	Os09t0525300-01	Os09g0525300	281	MGGVTSSSAGGGGGGETALGDLPESCVAEVLRRLDPPEICRMARLSRTFHGVWEAKLPRNYARLLAVAADGEAAALEAIPKKEVYARLCRRNRLDGGTKEFWLDKGGGGVCMTISSRALSITGIDDRRYWNFIPNDESRFHAVAYLSQIWWFEVRGEVEFCFPEGTYSLFFRLHLGRPLKRLGRRVYSSEHIHGWDIKPVRFQLSTSDGQQAQSKCYLTDPGVWINHHVGDFVVKSSNELVKIQFAMVQIDCTHTKGGLCVDSVAVKPQYLAKKKASRIYV
SGF6	ORTHO05D000774	Oryza sativa	Os10t0522400-01	Os10g0522400	165	MGAGVSGLFGLGGDEGETSAAVGGAAAAGLGDLPELCAAEVLLRLDAPEICRLARLNHAFRGAAGADFVWEAKLPENYRYLMSFVEGGGGGDDGRQLRRRRWRPAGKKEIYARLARPVPFDGGSKEFWLEKSKGRVCMALSSKSLVITGIDDRRYWQHIPTAESR
SGF6	ORTHO05D000774	Physcomitrium patens	Pp3c16_11450V3.1	Pp3c16_11450	302	MGDNLQASNSSEGGLDQLPLNCLGTILSFLTPREVEIAAYVCRSFREASKWNFVWEKMLPPRYEQLAALDPAFDATRFRDLREFYFHLCQFSLFANSTKGFWLDRNTGGACLGIGARGLDITWGNDLRYWKLTTKEDSLFPEVAQLESVCWFEVKGEIQCSLPPGDYTLSWRLFLVEAYSWESEPVHFTLSKDGLQHIESKCYLTELPGEVPGFRVPTKRQLDDGWVEYDVGEFTVGSDEKNCAVRFAMVAIEKLYWKYGICLDGAVIRPTNLKAATRVNDDEQTVHEAEQMRCQQDIPEYC
SGF6	ORTHO05D000774	Physcomitrium patens	Pp3c24_14280V3.1	Pp3c24_14280	277	MSMADLPDDCIASILARTTPWDATRMAGVCTAFKRVTESEKLWKDFLPGDYDSICEAQTKLQSIREIVKSLAAGVFLDDGLQKYMLLQRSRGVCRKLSVVAMDIAWGSDMRFWKWEHSRSSCFGKVAHLLAICWLEVRGTWSCSLPAGSYTAVWRLRAANPMGGRFHFLSWKKPLTFTVATADGQTVEKSLNLVDTPRKCFEDWLEFEVGTINVHGDGSSTQKVKLTYSIRETDCTYWKGGLYLDCLTLRPSGCLEDVPPITKDLEFSKIRGHPGVF
SGF6	ORTHO05D000774	Selaginella moellendorffii	SMO228G0028.1	SMO228G0028	260	MSSLGDLPIDCIAAIIGRTTPLDACRLASVSQAFSAAASSELVWQGLLPSDVRGECCDYRDGWKSWKELLQALAEGIFVSGGRQKYLLLRRTGGVCRILSVAGMGVTWGQDARFWRWEDSRSSCFGKVAHLLAVCRLEVFGKWKCSLTPGKYSATWRLKVANPQFGQILYLAWKKPLLFRLKITHGKVLEKELDLMKQVPVTGFEQWFEFEVGQIVVEGERLIAQPLELEFCIREVDCSYWKGGLYLDCLTLRPTEEEKN
SGF6	ORTHO05D000774	Selaginella moellendorffii	SMO356G0745.1	SMO356G0745	272	SLGDLPAGCLAGILGWLSPRDVGRLALVNKTFLEASRSDAVWRRMLPPHWKEVVRDGAGSAMDVYERLSVGVALCQIYWIDRPTGGVCNMISARALRIVWGDDGRYWDWRSMNGSRFDEVAFLRDVCWLEIRGSFSGYLKLGSYRVSFRLQLLESHARRRGRGGDWHDDAYGWEAQPVIFSLSAPPSSTRERRRYLASARQLHRGGQSGIDAADLAAARVVEDGWMEYDAGEFCVEDEDFPVALEFSLVEIRGGNWKSGLYVDGVVIKPTFL
SGF10	ORTHO05D001118	Amborella trichopoda	ATR0030G024.1	ATR0030G024	197	MAMDSSNFMKLLFSLLLLPFFFFSPCFSTNSDGNALHAFRSVLSDPTNVLQSWDPTLVNPCTWFHVTCNDHNRVIRLDLGNSNITGHLVPELGKLEHLQYLELYRNNIGGKIPKELGNLKNLISLDLYDNKLEGEIPKAFAKLKSLRFLRLNNNRIGGVIPRELTTLPNLKFFDVSNNDLWGTIPTEGPFANFPLSS
SGF10	ORTHO05D001118	Amborella trichopoda	ATR0582G063.1	ATR0582G063	210	MALSVLFFLFCAIFSFVNANTEGDALYALRRTLHDPANVLQSWDPTLVNPCTWFHVTCNNDNRVTRLDLGNARLIGTLVPELGRLESLQYLELYKNNLVGEIPKELGHLRNLISLDLYQNNLTGSIPPSLSKLQSLRFLRLSGNKLTGKIPKELTQLGNLKSLDLSHNNLCGTIPTSGSFSKLSLKSFENNPRLQGPELMGSVGYDMGCN
SGF10	ORTHO05D001118	Amborella trichopoda	ATR0582G361.1	ATR0582G361	67	MAYWALIFLLASSVIVNATNFEGEALMAQREKLVDPSNVLASWDSEFADPCQWFHVHCNDVSSVISL
SGF10	ORTHO05D001118	Amborella trichopoda	ATR1096G017.1	ATR1096G017	209	MDFTGLVFGLLVLVPMVYSNTEGDALYTLRRSLSDPDNVLQSWDPTLVNPCTWFHITCNQDNRVTRVDLGNSNLSGRLVSELGKLEHLQYLELYKNNIQGTIPAEFGKLKNLISLDLYNNNISGVIPPSLGNLKSLVFLRLNDNQLTGRIPRELAGIPSLKVVDVSTNNLCGTIPTTGPFEHIPLSNFENNARLEGPELQGLAVYDTNC
SGF10	ORTHO05D001118	Anthoceros agrestis	AagrBONN_evm.model.Sc2ySwM_344.909.1	AagrBONN_evm.TU.Sc2ySwM_344.909	217	MGATNAIPLLLLLACALWVPGSKANLEGDALHALRRSLVDPGNVLQSWDPTLVDPCTWFHVTCDRRNHVTRVDLGNAKLSGSLVPDLKHLQYLQYLELYKNNIGGQIPEELGECKNLVSLDLYMNNFTGPIPKSLANLQSLAFVRLNDNQLNGPIPRELASIKSLKFVNLANNDFCGYIPSTGSFERLSLKGFENNPRLKGPELLGFDLPASNDGCN
SGF10	ORTHO05D001118	Arabidopsis thaliana	AT3G43740.1	AT3G43740	218	MVAQNSRRELLAASLILTLALIRLTEANSEGDALHALRRSLSDPDNVVQSWDPTLVNPCTWFHVTCNQHHQVTRLDLGNSNLSGHLVPELGKLEHLQYLELYKNEIQGTIPSELGNLKSLISLDLYNNNLTGKIPSSLGKLKSLVFLRLNENRLTGPIPRELTVISSLKVVDVSGNDLCGTIPVEGPFEHIPMQNFENNLRLEGPELLGLASYDTNCT
SGF10	ORTHO05D001118	Arabidopsis thaliana	AT5G21090.1	AT5G21090	218	MASRNYRWELFAASLTLTLALIHLVEANSEGDALYALRRSLTDPDHVLQSWDPTLVNPCTWFHVTCNQDNRVTRVDLGNSNLSGHLAPELGKLEHLQYLELYKNNIQGTIPSELGNLKNLISLDLYNNNLTGIVPTSLGKLKSLVFLRLNDNRLTGPIPRALTAIPSLKVVDVSSNDLCGTIPTNGPFAHIPLQNFENNPRLEGPELLGLASYDTNCT
SGF10	ORTHO05D001118	Arabidopsis thaliana	sORF2647	AT2G15042, partial	145	MGKLRELESLDVAQNKLSGDIPQDLGDLSYLAYMNFSHNQLVGPLPGGTQFLTQNCSSFEENAGHFGPSLEKVCDIHGKTMQESEMPGSEEDEEEVISWIAATIGFIPGIAFGLMMGYILVCYKPEWFMNVFGKNKSRSTSSTTR*
SGF10	ORTHO05D001118	Marchantia polymorpha	Mp1g04150.1	Mp1g04150	201	MAQQMSLLCTRILILIWLLAIPFDALANLEGDALYAFRQHLNDPEEVLASWDNSLVNPCTWFHVTCNGDNNVIRVDLGNSSLSGSLVPELGNLASLEYLELFNNHISGSIPPELGNLANLASLDLYQNALTGTIPVTLGRLKNLKYLRMDHNILTGAIPTELTYIGSLLVVKLSYNNLTGVIPRFASSVSTFFQGNPYLIH
SGF10	ORTHO05D001118	Marchantia polymorpha	Mp1g18600.1	Mp1g18600	217	MERKSGTMVGVMVVGFLLLAELPYIVADYQGDALFALRRNLKDPANVLQSWDPTLVNPCTWFHVTCNSGNQVIRVDLGNAGLSGSLVPELGNLHSLQYLELSKNKLDGTIPQELGKLKNLVSLDLYYNNFTGEIPSSLGELKSLVFLRVNNNKLSGRIPNELTRLPNLKVVDFSSNNFCGTFPTSGSFARFSSKSFENNPSLNGPELLGAPYDSTCH
SGF10	-	Marchantia polymorpha	MpSGF10A	Mp1g25340	99	FRNLGPNNYLSGPVPSWIGDLSQLEDIDIKITNFSGSLPSEIGKLKNLRSLNAGASSLSGFLPPELGNLTSLQSIQLNDNKLTGSIPDSFKNLRNLTSL
SGF10	ORTHO05D001118	Marchantia polymorpha	MpSGF10B	Mp3g10170	179	MNQAKATWICALLLMWSFTGSATQNQTVGEEEQALLNQKEKLNDYFGNLISWTTAAGLSACQWFHIGCSNGSVTNITLGGRQLSGSLACDLGRLRSLQRLEMQDNSITEEIPWALGMATRLQHVNLSNNWLTGGIPHSLSKLPHLRSIDLSNNNLTGIAPKFRKGVYVNVAGNPLLRSC
SGF10	ORTHO05D001118	Oryza sativa	Os01t0279800-01	Os01g0279800	214	MAMAAAWSPALAAVLLAAAVASASNSEGDALYALRRALADPRGVLQSWDPTLVNPCTWFHVTCDRAGRVTRLDLGNSNLSGHLAPELGHLEHLQYLELYKNNIQGTIPAELGSLKNLISLDLYNNNITGTIPKELGKLSSLVFLRLNDNSLNGPIPRDLAKISSLKVIDVSNNDLCGTIPTSGPFEHIPLNNFDKNPRLEGPELQGLATYDTNC
SGF10	ORTHO05D001118	Oryza sativa	Os01t0809300-01	Os01g0809300	213	MGAGALGVVAMVAAAVVVAMAGANSEGDALSALRRSLRDPGGVLQSWDPTLVNPCTWFHVTCDRDNRVTRLDLGNLNLSGHLVPELGKLDHLQYLELYKNNIQGTIPSELGNLKNLISLDLYKNNISGTIPPTLGKLTSLVFLRLNGNRLTGPIPRELAGISSLKVVDVSSNDLCGTIPTSGPFEHIPLSNFEKNPRLEGPELQGLAVYDTNC
SGF10	ORTHO05D001118	Oryza sativa	Os03t0440900-01	Os03g0440900	218	MAPRVSLLAAGAVAVAVVLLLAAPARASNDEGDALYALRTRLSDPNGVLQSWDPTLVNPCTWFHVTCDHASRVVRLDLGNSNISGSIGPELGRLVNLQYLELYRNNLNGEIPKELGNLKNLISLDLYANKLTGTIPKSLSKLGSLRFMRLNNNKLAGSIPRELAKLSNLKVIDLSNNDLCGTIPVDGPFSTFPLRSFENNNRLNGPELQGLVPYDFGC
SGF10	ORTHO05D001118	Oryza sativa	Os05t0170700-01	Os05g0170700	223	MDERRAAASLLAVLVLSLVVSASSAAAGVAPAAPPDVLSSPAAAAGEGEGEAEALLAVKAALHDTANVLADWNAGSGGVVVAGGGGGGGPCNWSMVTCSKTGHVSVLDLAHRNLSGTLSPAIGKLRRLRLLFLQHNAISGPIPDTIGRLKVLQTLDLAYNHFTGTIPSILGHSKGIFLMRLSHNNLSGSIPDSLATAPSIVLLDLSFNNLSGPAPVFSANSVL
SGF10	ORTHO05D001118	Oryza sativa	Os05t0491400-01	Os05g0491400	216	MAPTSAGNLAPATAILVVVVAVVLAAAAASQDGDALTEFRKGMSDPDGALASWDPDLVNPCTWFRVTCNADNRVIRLDLEEMNLSGHLSADLARLDQLQFMEIASNNIEGPIPPEFGNLENLISLDLCNNTISGPIPPSLGKLKSLKFMRIDHNLLTGPIPNELAGLSNLMILNVSNNDLCGTIPTSGPFDHFPPSSFASNPRLRYPGMDDDDTGR
SGF10	ORTHO05D001118	Oryza sativa	Os08t0446400-01	Os08g0446400	410	MGLHIWCWLVVLFSLAPLCCSLSADGLALLDLAKTLILPSSISSNWSADDATPCTWKGVDCDEMSNVVSLNLSYSGLSGSLGPQIGLMKHLKVIDLSGNGISGPMPSSIGNCTKLEVLHLLRNRLSGILPDTLSNIEALRVFDLSRNSFTGKVNFRFENCKLEEFILSFNYLRGEIPVWIGNCSSLTQLAFVNNSITGQIPSSIGLLRNLSYLVLSQNSLSGTIPPEIGNCQLLIWLHLDANQLEGTIPKELANLRNLQKLYLFENCLTGEFPEDIWGIQSLLSVDIYKNNFTGQLPIVLAEMKQLQQITLFNNSFTGVIPQGLGVNSSLSVIDFINNSFVGTIPPKICSGGRLEVLNLGSNLLNGSIPSGIADCPTLRRVILNQNNLIGSIPQFVNCS…
SGF10	ORTHO05D001118	Oryza sativa	Os11t0514400-01	Os11g0514400	200	MGAHSAAAALFTALLAFATLVSCNTEGDILYAQRQELKDINNVLASWDPTLVNPCTWVHVTCDNSNSVIRVDLGSAGLSGSLIPQLGGLSNLQYLNLHGNNLTGTIPQSFGNLTNLVRLELQKNSLSGTIPASLGNIKTLKFLRLNGNSLTGTLPLEVLSLVLVGNLTEINVARNNLDGTVGSTGLRVTAIIQDRLKISG
SGF10	ORTHO05D001118	Oryza sativa	Os11t0514500-01	Os11g0514500	250	MGAHSSAAAAALFTGFLALATLVSCNTEGDILYAQRLAWKDPFNVLQSWDPTLVNPCTWFHVTCNNNNSVVRVDLGLAGLSGPLIPQLGGLSYLQYLELYGNELNGSIPAALGNLSSLVSLDLQGNLLTGAIPDSLGAISTLRNLRLYGNNLTGTIPQSLGSLTSLVKLELQKNSLSGTIPASLGNIKTLELLRLNKNSLTGTVPMEVLSLVLVGNLTELNVAGNNLDGTVGSTGWRVTTIIQDNLKTSG
SGF10	ORTHO05D001118	Oryza sativa	Os11t0514700-00	Os11g0514700	242	MHFNVVQAALKVSKHSQSTTVMGAKFAEAKVSAVVLTGLVALATLVSCNTEGDILYKQKVAWEDPENVLQTWDPTLHNPCTWMHITCNNDNSVIRVDLLNVLISGPLIPQLGGLKNLQYLQLYGSRLNGSIPATLGKLKHLVSLDLSNNLLTGAIPPSLGAISNLLILRLSGNNLTGAIPPSLGNLKSLEILELGNNALSGSIPASLGDIETLNYLDLNDNMLTGTVPLEILSRLVTTLDEL
SGF10	ORTHO05D001118	Physcomitrium patens	Pp3c11_5590V3.1	Pp3c11_5590	224	MANVVAARRMEKSKEGSVLFALLVAALLPTALSNSEGDSLYALRRSLTDPSNVLQSWDPTLVNPCTWFHVTCDSQNRVIRVDLGNARLSGSLVPELGDLQHLQYLELYKNNLTGHIPSEFGKLKSLVSLDLYHNNFTGSIPRSLGKISNLAFLRLNSNHLTGRIPRELTSITTLKAVDMSNNDLCGTIPVTGSFSHLQAKSFENNPRLNGPELEGFVPYEMSCH
SGF10	ORTHO05D001118	Physcomitrium patens	Pp3c7_22100V3.1	Pp3c7_22100	168	WDPTLVNPCTWFHVTCDGQNRVIRVDLGNARLSGSLVSELGALQNLQYLELYKNSLTGHIPSELGKLKSLVSLDLYHNNFTGSIPRSLGKLSNLAFLRLNNNKLTGRIPRELTSITTLKAVDFSNNDLCGTIPVTGSFSHLQAKSFDNNPRLNGPELEGFVPYEMSCH
SGF10	ORTHO05D001118	Selaginella moellendorffii	SMO164G0019.1	SMO164G0019	222	MASAVGALAAVILALGLWIAAGNVEGDILHSLRRSLVDPENVLQSWDPTLVDPCTWFHITCDNQNRVIRVDLGNAKLSGVLIPELGKLENLRHLELYKNNIAGHIPQELGNLKKLVSLDLYMNNLTGPIPRSLGKLKSLAFLRLNKNRLSGQIPRELSSISSLKIVDLSDNDLCGTIPTSGSFAQFSPKSFDNNPRLNGPELQGFVPYDEAASAVTSDEHSC
SGF10	ORTHO05D001118	Selaginella moellendorffii	SMO167G0027.1	SMO167G0027	179	ALSAFRQSISSDPRGALSGWSADHGSLCQWRGVTCSSDGRVIKLELVNLSLQGKISPELSRLEFLKKIDLRGNELSESIPKELWVLKRLFHLDLSGNNLSGTIPPNVGNLVNLRTLNLGNNHFQGSLPTQFGKLVRLRHLRLDHNHFTGFIPGRAFCNLKSLQTLDVSENSFVTECFPR
SGF10	ORTHO05D001118	Selaginella moellendorffii	SMO177G0014.1	SMO177G0014	196	SSRMEKQIGKVISLVSFLFFLKGKYSGEALAAFKEALVDPNGVLDSWDPSLVNPCTWFRVTCNSDDFVMRIDLENASLRGRLVPHLASLRHLQYLELNNNLLSGSIPRELGELKELISLDLYDNYLTGTIPDTLSELDSLRFLRLNSNLLSGSIPESLTCLSNLKVIDFSDNNLSGRVPNDGPFARMSSKRCEDVL
SGF10	ORTHO05D001118	Selaginella moellendorffii	SMO203G0039.1	SMO203G0039	212	MKLLGLFLLFDLVLASLEGDSLNAFKQAVSDPTGMLETWDPTLINPCTWLYVTCNQDDLVTRVDLARGDLSGKLVPELANLKNLEHFLPFLWIDWSMSRELFNNSLTGSIPPEFGNLKSLVSLDLQYNHLSGSIPKSIGNMRSLVFLRLNDNQLSGQIPQELTTLPNLKVLDLSHNSFTGTVPRGGSFQKFGQKSFEGNPGLCGHAVKRPCT
SGF10	ORTHO05D001118	Selaginella moellendorffii	SMO203G0045.1	SMO203G0045	223	SSRMEKQIGKVISLVSFLFFLKGKYSGEALAAFKEALVDPNGVLDSWDPSLVNPCTWFRVTCNSDDFVMRIDLENASLRGRLVPHLASLRHLQYLFSDLAATLVTYQSSFRLVEADLFHIYRELNNNLLSGSIPRELGELKELISLDLYDNYLTGTIPDTLSELNSLRFLRLNSNLLSGSIPESLTCLSNLKVIDFSDNNLSGRVPSDGSFARMSSKRCEDVL
SGF10	ORTHO05D001118	Selaginella moellendorffii	SMO347G0036.1	SMO347G0036	144	DPRGALSGWSADHGSLCQWRGVTCSSDGRVIKFDLRGNELSESIPKELWVLKRLFHLDLSGNNLSGTIPPNVGNLVNLRTLNLGKNHFQGSLPTQFGKLVRLRHLRLDHNHFTGFIPGRAFCNLKSLQTLDVSENSFVTECFPR
SGF10	ORTHO05D001118	Selaginella moellendorffii	SMO356G0149.1	SMO356G0149	213	MEFSGLFPAALAALIYLSVASCNSEGDALYALRRSLIDPENVLQSWDPTLVNPCTWFHVTCDRRNHVTRVDLGNANLSGVLVPELGSLQHLQYLELYKNNIRGKIPEELGQLKSLVSLDLYMNNFTGELPASLGNLKSLVFLRVNNNQLRGRIPRELTSIASLKVVDVSSNNLCGTIPTSGSFARFPAKNFENNPRLDGPELQGSVFYETACT
SGF10	ORTHO05D001118	Sequoiadendron giganteum	SEGI_01729.1	SEGI_01729	192	MANKSILMSFLLVGFIIVNLLSAHSHAQLGNEIEILLEFKESLSDPDNILANWNQPHDPDPNPCEWSHVTCNDKQSVIRLDLGDTRLSGPISVRFAEVSYLTYLDLHSSGFNGTIPESLEYCKLLEEFDVSLNALTGPIPSSLNVLSNLRIFNVSYNQLTGPIPTGDVFQQFGNDSYKGNPGLCGPVVGRNC
SGF10	ORTHO05D001118	Sequoiadendron giganteum	SEGI_01811.1	SEGI_01811	276	MAATSKATLIFMYFLLGGFVVCNLLSTQCNANAEGDALIDVKNMLHDPNNVLGSWDETLVDPCTWLCITCDDNNHVMRVDLQFRGLSGTLSARIGDLPNLQYLNLYRNSLSGSLPPTLGKLKNLRALDVSDNKFSGKIPTSLGQLSNLRFLYLLNNQFSGPVPTGGSFSRFGYESDVTKAHRREEEKKSRGPPSSSIVQHDASSQPIMKAPYGEPSLSQPLQPPIVPVPKIVNGKRPTAKPLESTIPTVSQPTPSAPIQESILPLEIAMEDTPMDK
SGF10	ORTHO05D001118	Sequoiadendron giganteum	SEGI_02670.1	SEGI_02670	151	MAAISTSMLILIYILVGGFVVCNLLSIQCDANAERDALTDVRNMLNDPQNVLESWDPTLVDPCSWFHVTCDNNQHVTRVDLAFSGLSGTLSPRIGDLPNLQYLHLYRNSLSGSLPPSLGNLKNLISLHLSDNKFSGKIPTSLVQLSNLRFL
SGF10	ORTHO05D001118	Sequoiadendron giganteum	SEGI_07515.1	SEGI_07515	477	MPDYPSDGRCGSYLIGALNSDGIVLLSLRKDLNAPPNVFSSWRSCDENPCKWEGVLCHVDHTVLVLNLTDRHISGTLSPAIGGLHNLKELYLVQLYNNFLSGSIPLSIFGLPLLEVIYLGTNILTGAIPSNVRNLRALSKLWLGQNSLTGAIPPSIANCSNLTELYLHQNQLAGDLPEVLGRLSKLEYLYVASNNLGGNIPKSLGNCTNLIEVEFSDNQFIGEFLEEFGKCSNLTMISATQNQFTGAIPTCIGSLHRLTRLYLNQNFLSGGIPAEITNLKSLRYVLLYDNQLFGSIPPTLGAQSNLTRIDFTGNQLTGSIPPTLCSSGHLELLLVRSNQLKGTIPSSLGVCRNLSFIDLSMNELSGVLPPQLGQLSKLKLLNLGSNRLSGAIPDSMGNL…
SGF10	ORTHO05D001118	Sequoiadendron giganteum	SEGI_09351.1	SEGI_09351	302	MPIDKDESLGCCRNNPLFEDFDYTLDVWSGYDCEQYTSKVFDENSYETFTFGTIVEDEFEDQEEIRIPNFFSHKHSLFGGNQLQRGKSLEYNNDEGCENIGVTFQRVNFESKSKFFMSDVCTNKERSAEFSARAMYFDAQKDFALAAGFIFDEWQLAPHFGQLKCVGFIIVNLLSTHSGAEPYDEFEILLDFKKFLDDPDNLLSSWSENVQDPCQWSHVSCSNNGSVIGLDLGDTKISGPISPGLGELNYLENLDLHNSSFNGILPDTLGYPMFMKELDVSFNQLSGPIPSTFNQLSNLQTL
SGF10	ORTHO05D001118	Sequoiadendron giganteum	SEGI_21446.1	SEGI_21446	220	MAATDPSCSFVTVVLPVVMLALMASSSVSSNSEGDALHAFRRGLSDPYNILQSWDPTLVNPCTWFHVTCDMNNHVIRLDLGNGNISGRLVSELRKLEHLQYLELYQNNIVGTVPEDFGNLKNLISMDLYGNKISGEIPRSLGNLKFLQFLRLSNNRLTGRIPMELTTIPNLQILDVSNNDLCGTIPTNGALQHFPLESFDNNPRLRGPQLQGLVSYDSGC
SGF10	ORTHO05D001118	Sequoiadendron giganteum	SEGI_23030.1	SEGI_23030	213	MERWGLLLLSVIVVGVKVAANSEGDALYALRRNLNDPLNVLQSWDPTLVNPCTWFHVTCDRQNRVTRLDLGNARLSGTLVGDLGKLTSLQYLELYKNNIRGEIPKELGNLKNLISLDLYQNNLTGKIPASLGDLKSLRFLRLNGNKLTGRIPRRLTNLSSLKILDVSDNDLCGTIPVSGAFSKFSQKSFENNQRLNGPELIGSVVYNLGCGYP
SGF10	ORTHO05D001118	Sequoiadendron giganteum	SEGI_24700.1	SEGI_24700	208	MATTSTSMLILFYFLVGGFVVCNFLSIQCNANEEGDALIDVKNMLHDPQNVLDSWDQTLVDPCTWLHITCDDSNHVTRVDLQFMGLSGTLSSRIGDLPNLQYLQLYRNSLSGSLPPSLGKLKNLISLDISDNKFSGKIPTSLEQLSNLRFLYLSNNQLSGPIPTGGPFSRFQFNRSKEEGKKKDKNPRPKSEGRSKSPSKKSKVKCWN
SGF10	ORTHO05D001118	Sequoiadendron giganteum	SEGI_41000.1	SEGI_41000	319	MLEEVLAIEKGMPSMKRKMKSQKATREFYVFADDALVSSNVDFWAQEWDEEDIISLDYEDHTIGFHFTNVRDSEWFAEEDDCLLDILLETMSKSQKSGDTRSKESIAKEIKTRGKGEYRGVLVSMAAASASASMLCMLIVICNLLSTSCNANYEVDALIDVKKMILQDPMNALETWDPSSPNPCKWEHVGCHGDDRVYWVDLKRQKLYGALSPRIGDLQSLEYLALCYNSFFGILPTSLGNLKDLRVLDLSDNKFSGQIPHSLSQMPSLRVLYLQFNQLSGRVPRDGSLSEFGYLSFQGNPDLCGDVVQKECPKRSLNL
SGF13	ORTHO05D007973	Arabidopsis thaliana	sORF3508	AT3G03341	72	MIPICVQCGTGGNPCRCKVVGPTLGLVAFVAAGIVEWPVGALVYIFKHAKGRRIMGHPATHVYPKVSRSIPI
SGF13	ORTHO05D007973	Chlamydomonas reinhardtii	Cre03.g207100.t1.2	Cre03.g207100	103	MATANPLHAHRYAPAAAPAQQVVTVTHTHMTATSAPLCFECGSANPCHCKMFGPLLGFVVGVCVATVAYPIGGCLWCVNRPTSTRLLAAPADIYHLTNATIPI
SGF13	ORTHO05D007973	Chlamydomonas reinhardtii	Cre03.g207152.t1.1	Cre03.g207152	69	MFVCVECGSNNPCRCKVLGPTLGLIGALLTAIVAYPLGALCCCVSRSTSDRMFAAPADVFTVTSATLPI
SGF13	ORTHO05D007973	Chlamydomonas reinhardtii	Cre13.g575701.t1.1	Cre13.g575701	68	MVCIECGSSNPCKCKMLGPTLGFGIGAAVAGICYPIGCLIYLCAQPQANKLFAAPADVFKFITDAIPI
SGF13	ORTHO05D007973	Marchantia polymorpha	MpSGF13A	Mp7g00660	74	MPFIPCCIECGSHANPCRCRIVGPTIGFVAFALAAVIEWPLGAVVWCFKHAKGRRIMGHPAAVVYPNVSSIFPI
SGF13	ORTHO05D007973	Marchantia polymorpha	MpSGF13B	Mp7g00670	74	MPYIPCCVQCHTRENPCHCKVVGPTLGFVGFALFALVEWPVGALVWCFRHHKGRRIMRHPANVVYPRIAAAVPI
SGF13	ORTHO05D007973	Marchantia polymorpha	MpSGF13C	Mp7g14620	75	MAVYIPYCMECGNDDNPCRCKVIGPSVAFACFCIAAAIEWPVGAIIWCFKKSKGTSIMGHPAMVVYPTVKDLIPC
SGF13	ORTHO05D007973	Oryza sativa	Os01t0644200-01	Os01g0644200	74	MAYVPVCVQCGTHSNPCRCKVLGPTLGFVAFVVAGVVEWPLGAFVYLFRHRKGRRIMGHPANVVYPRITSAIPI
SGF13	ORTHO05D007973	Physcomitrium patens	Pp3c19_5460V3.1	Pp3c19_5460	73	MAIPLCVQCGTHQNPCRCKIVGPTLGVVAFLITAVVEWPLGAALYCFRKQKARRLLHHPNRVVYPRVSGAIPF
SGF13	ORTHO05D007973	Physcomitrium patens	Pp3c19_5500V3.1	Pp3c19_5500	73	MAIPLCVQCGTHQNPCRCKIVGPTLGVVAFLITAVVEWPLGAALYCFRKQKARRLLHHPNRVVYPRVSGAIPF
SGF13	ORTHO05D007973	Physcomitrium patens	Pp3c19_9840V3.1	Pp3c19_9840	73	MAIPLCVQCGTRQNPCHCKIVGPTLGVVAFLITAVVEWPLGAALYCFRRQKARRLLHHPNRVVYPRVASAIPF
SGF13	ORTHO05D007973	Physcomitrium patens	Pp3c21_13210V3.1	Pp3c21_13210	73	MAIPLCVQCGTHQNPCRCKIVGPTLGVVAFLVTAVVEWPLGVALYCFRKQKARRLLHHPNRVVYPRVSGAIPF
SGF13	ORTHO05D007973	Physcomitrium patens	Pp3c23_9530V3.1	Pp3c23_9530	73	MAIPLCVQCGTRQNPCRCKIVGPTLGVVAFLVTAVVEWPLGAALYCFRKQKARRLLHHPNRVVYPRVSGAIPF
SGF13	ORTHO05D007973	Physcomitrium patens	Pp3c24_9690V3.1	Pp3c24_9690	90	MDTITAQAAGSADPPCCPFVPLCFECGTRRNPCHCRILGPTVGFVAFAVAAVVEWPVGAFVYCFRHLKGRRIMAHPAAVVYPRVSACFPI
SGF13	ORTHO05D007973	Physcomitrium patens	Pp3c4_12160V3.1	Pp3c4_12160	76	MACIPIPLCIECGNTDNPCRCKIIGPTLGFVGFVVAAVIEWPIGAAVWCCNHKKGERIMSHPAMVVRPSISNCIPF
SGF13	ORTHO05D007973	Physcomitrium patens	Pp3c8_12730V3.1	Pp3c8_12730	90	MNTVTAQAAGAADPPCCPFVPLCFECGTRRNPCHCRILDPTLGFVAFAVAAAFEWPVGAFVYCFRHLKGRRIMAHPAAVVYPRVSACLPI
SGF13	ORTHO05D007973	Physcomitrium patens	Pp3c8_12731V3.1	Pp3c8_12731	90	MNTVTAQAAGAADPPCCPFVPLCFECGTRRNPCHCRILDPTLGFVAFAVAAAFEWPVGAFVYCFRHLKGRRIMAHPAAVVYPRVSACLPI
SGF13	ORTHO05D007973	Selaginella moellendorffii	SMO111G0099.1	SMO111G0099	81	MATVTTRRHRVPTCVECGTRQNPCHVKVVGPTLGFVAFAIAAVVEWPVGAIIYPFRHFKGRRIMGHPVRVVYPRVASAIPF
SGF13	ORTHO05D007973	Selaginella moellendorffii	SMO111G0149.1	SMO111G0149	87	MATVTTTPAVTTRRHRIPTCVECGTRQNPCHVKVIGPTLGFVAFAIAAAVEWPVGAIMYPFRRIKARRMIGHPMRVVYPRVSSAIPF
SGF13	ORTHO05D007973	Selaginella moellendorffii	SMO111G0160.1	SMO111G0160	94	MARALGTTHVATPVATTRTRRHRIPSCVQCGTRQNPCHVKVIGPTLGFVAFAIAAAVEWPVGAIMYPFRRIKGRRMIGHPMRVVYPRVSSAIPF
SGF13	ORTHO05D007973	Selaginella moellendorffii	SMO111G0173.1	SMO111G0173	94	MTRAVGTTHVATPVATTRTRRHRIPSCVQCGTRQNPCHVKVIGPTLGFVAFAIAAAVEWPVGAIMYPFRRIKGRRMIGHPMRVVYPRVSSAIPF
SGF13	ORTHO05D007973	Selaginella moellendorffii	SMO293G0011.1	SMO293G0011	94	MARALGTTHVATPAATTRTRRHRIPSCVQCGTRQNPCHVKVIGPTLGFVAFAIAAAVEWPVGAIMYPFRRIKGRRMIGHPMRVVYPRVSSAIPF
SGF13	ORTHO05D007973	Sequoiadendron giganteum	SEGI_20637.1	SEGI_20637	181	MAVGVGFPVCIQCATQDNPCRCKAVGPTVGFATSLVAALVEWPVGAFVFCPKGRRIMAHSATVRETRGNAIALKAGQHLGFRLRILENIYLQRKPEENCGAKGLFNQESERMFCIECGTHDNPCRCKVVGPTLGFLCLLITALLLWPVGAIIFCFNRAKGRKIMAKPVDHIYPAVSNAIPI
SGF13	ORTHO05D007973	Sequoiadendron giganteum	SEGI_23307.1	SEGI_23307	86	MLNAQMQGMYLEQEVEITMDHAFSSWMEDKCKVVGPTLGFAAFLVAALVEWPVGALVFCFRQPKGKRIMAHSATVVFPSVSNAIPF
SGF13	ORTHO05D007973	Sequoiadendron giganteum	SEGI_27045.1	SEGI_27045	130	MTPSKRLCTKVYDSDGREEREKLVAMRQLKRWTAPRVSRKLWCEGVISQEIESFGQEIESMFCIQCGTHDNPCRCKVVGPTLGFLCLLISALLLWPVGAIIFCFNRAKGRKIMAKPVNHIYPAVSNAIPI
SGF17	ORTHO05D009227	Amborella trichopoda	ATR0111G019.1	ATR0111G019	117	MALQFTAGHLKLKCLPILVTNRRFNSLEKQHKRSGYTVSERREGDGRPIPQRFPSKALIARTAIAVFALGFIDAGYSGDWSRIGAISKETEELLKVAAYLVTPLCLSLIFLIREEKT
SGF17	ORTHO05D009227	Anthoceros agrestis	AagrBONN_evm.model.Sc2ySwM_228.2308.1	AagrBONN_evm.TU.Sc2ySwM_228.2308	172	MKASSCCCCSLSCRDVKGNAFAVFTGTTWAKPQQQQCGLKPTSRGSDSRLAQQCNGQVSLLPGATTLFTARPRRCKLRVVRKRGLVPAAVGDEEQPTPVQPDEQGKPFYSSKLFRVGVVVFLTSGFVDAGYSGDWSRIGAITTEVEAALRLAAVVVVPTSALVLWLIAKTDD
SGF17	ORTHO05D009227	Arabidopsis thaliana	sORF6086	AT4G30845	114	MLTLQHSSFVSFCPNDNKLRSFANGVTIMSKRRDFSEKSNEERPILRIKVPNTIVARSAIAVLSLGFIDAGYSGDWSRIGVISKETEELLKIAAFLVVPLCIFLALSFSNDSTD
SGF17	ORTHO05D009227	Chara braunii	GBG72041	CBR_g10976	363	MWASRSAPAHFASCAFSFAQEETGVILCGSRNRNRACTSYGAQWGSSMATFSKQPATVTAIAAAGVGHVALISMSSNPRGSEMTTMPLSTRFHTAKRHAGMRRRSWKLPSPRVEHASCWKLPSQPDRLAATARKQLLSLPSPSGNAHDLNHSTRQRSKAPSPCAYFQQPLRDDKAGTALLAVQSVTVRLSMFHVGVPHWYARGPVFGRSLITQVMMSSLLPGAKISTVGVRHSELSGSTRMPVVQVRAGSEQGSGEEGMASRGVEDGGTNDLITPTNNTPPRSPSTTTPLLSESQPRSFFRRSTFWVQVALVITALGFVDAGYSGDWSRIGAVSLETEQSLRSAAFFVVPAILGIVAALGRGD
SGF17	ORTHO05D009227	Marchantia polymorpha	MpSGF17	Mp3g15380	150	MGPTAQALGSALPQITRTVTCFNPTSGKKFGNSFRPCELLRRPSAVHIRFLRQSVGRRKPAIVVRCERNSGETEEKSSDEDKPFFLSADFWLQVAIFLFAAGFVDAGFSGDWSRIGVLTKETEGELQMAAIGVVPLAGTLIWSISQRRKL
SGF17	ORTHO05D009227	Oryza sativa	Os03t0210900-01	Os03g0210900	85	TPKHPTTTAHTAQHAGVVTRGALLRSGAALFALGFVDAGYSGDWSRIGAISKDTEEALKLAAYAVVPLCLAVVFSPSSEDGSNNT
SGF17	ORTHO05D009227	Physcomitrium patens	Pp3c17_8590V3.1	Pp3c17_8590	161	MAICVLIPARPLTRGATRIHDSRGLSSGPSSGIARFCSSDGELVSVLFKNRVAFGRELGFTSQGMPVFSRKRRVIATAQERDEDRLQGGGEKPFYAAIEFWIQAALVVVAFGFVDAGYSGDWSRIGALSPETEAQLRTAAYFVVPFSASVVWAIGKRKNTS
SGF18	ORTHO05D009796	Arabidopsis thaliana	sORF6133	-	36	MIVPSWTSDKIGTIQRRLACALRKDDTLKSRYDPNL
SGF18	ORTHO05D009796	Marchantia polymorpha	MpSGF18A	Mp5g08160	77	MVDIKQSCTQPLVPSGTSDKIGTIQRRLAWPLRKDDTHKSRNGPNFFGDLPHELQFHHTPQSLHRAQADSEWHRSSL
SGF18	ORTHO05D009796	Physcomitrium patens	Pp3c1_26810V3.1	Pp3c1_26810	49	MLDSLCVLSAKFTSDKIGTIQRRLAWPLRKDDTHKSRNGLNFFLSPRLQ
SGF18	ORTHO05D009796	Physcomitrium patens	Pp3c1_26830V3.1	Pp3c1_26830	37	TSDKIGTIQRRLAWPLRKDDTHKSRNGLNFFLSPRLQ
SGF18	ORTHO05D009796	Physcomitrium patens	Pp3c1_6540V3.1	Pp3c1_6540	53	EGGGLTTHVSSETSDKIGTIQRRLAWPLRKDDTHKSRNGPNFFPLSTAFDCCF
SGF18	ORTHO05D009796	Physcomitrium patens	Pp3c10_15080V3.1	Pp3c10_15080	127	MLCCAAESSFVSSETSDKIGTIQRRLAWPLRKDDTHKSRNGPDFFVPLSGSLNLPFAVCKVDLLFVTAVHKHCGRSGPLLHVYRARKQTGEGAISTKANVVWNVKVMCRGKKASMGEDVIWCGGEEG
SGF18	ORTHO05D009796	Physcomitrium patens	Pp3c10_15084V3.1	Pp3c10_15084	127	MLCCAAESSFVSSETSDKIGTIQRRLAWPLRKDDTHKSRNGPDFFVPLSGSLNLPFAVCKVDLLFVTAVHKHCGRSGPLLHVYRARKQTGEGAISTKANVVWNVKVMCRGKKASMGEDVIWCGGEEG
SGF18	ORTHO05D009796	Physcomitrium patens	Pp3c15_10810V3.1	Pp3c15_10810	109	MAWHKSVEIYSGSDRKDCVSSETSDKIGTIQRRLAWPLRKDDTHKSRNGPNFFQSFPLLLSFRSVGTCSASAFDSFRWVCPTASHAHTKQATAHMSTSVSTYPLVQCWK
SGF18	ORTHO05D009796	Physcomitrium patens	Pp3c15_10813V3.1	Pp3c15_10813	109	MAWHKSVEIYSGSDRKDCVSSETSDKIGTIQRRLAWPLRKDDTHKSRNGPNFFQSFPLLLSFRSVGTCSASAFDSFRWVCPTASHAHTKQATAHMSTSVSTYPLVQCWK
SGF18	ORTHO05D009796	Physcomitrium patens	Pp3c15_10820V3.1	Pp3c15_10820	109	MAWHKSVEIYSGSDRKDCVSSETSDKIGTIQRRLAWPLRKDDTHKSRNGPNFFQSFPLLLSFRSVGTCSASAFDSFRWVCPTASHAHTKQATAHMSTSVSTYPLVQCWK
SGF18	ORTHO05D009796	Physcomitrium patens	Pp3c21_2000V3.1	Pp3c21_2000	69	MLYCPGGRSNVSSETSDKIGTIQRRLVWPLRKDDTHNSSNGPNFFFSFSLTFRCFFLSSLATSAAWVFF
SGF18	ORTHO05D009796	Physcomitrium patens	Pp3c21_2022V3.1	Pp3c21_2022	69	MLYCPGGRSNVSSETSDKIGTIQRRLVWPLRKDDTHNSSNGPNFFFSFSLTFRCFFLSSLATSAAWVFF
SGF18	ORTHO05D009796	Physcomitrium patens	Pp3c24_16090V3.1	Pp3c24_16090	120	MKPIRDGVAQERRFLVRDCTIVSSETSDEIGAMQRRLAWPLRTDDTHTSRNDPHFFSSLPVLFEPAPQLHFILPSTTSYCFTMSHQMATAHAYQLIHLLQMKQHSTAFCWEHTSINFVVL
SGF18	ORTHO05D009796	Physcomitrium patens	Pp3c24_16091V3.1	Pp3c24_16091	120	MKPIRDGVAQERRFLVRDCTIVSSETSDEIGAMQRRLAWPLRTDDTHTSRNDPHFFSSLPVLFEPAPQLHFILPSTTSYCFTMSHQMATAHAYQLIHLLQMKQHSTAFCWEHTSINFVVL
SGF18	ORTHO05D009796	Physcomitrium patens	Pp3c24_6960V3.1	Pp3c24_6960	79	MLHESFSSNGVRLATARDTHQGQHCRERNPYNTPCNLSNVVSSETSDKIGTIQRRLAWPLRKDDTHKSRDGPNFLYLWH
SGF18	ORTHO05D009796	Physcomitrium patens	Pp3c24_6961V3.1	Pp3c24_6961	84	MLHESFSSNGVRLATARDTHQGQHCRERNPYNTPCNLSNVVSSETSDKIGTIQRRLAWPLRKDDTHKSRDGPNFLYLWHVNSYH
SGF18	ORTHO05D009796	Physcomitrium patens	Pp3c27_1930V3.1	Pp3c27_1930	50	YTTLYSPSKHFSSETSDKIGMIQRRITWPLRNDYTHKSRYGPDFVPLSYL
SGF18	ORTHO05D009796	Physcomitrium patens	Pp3s1006_30V3.1	Pp3s1006_30	127	MLCCAAESSFVSSETSDKIGTIQRRLAWPLRKDDTHKSRNGPDFFVPLSGSLNLPFAVCKVDLLFVTAVHKHCGRSGPLLHVYRARKQTGEGAISTKANVVWNVKVMCRGKKASMGEDVIWCGGEEG
SGF18	ORTHO05D009796	Physcomitrium patens	Pp3s638_22V3.1	Pp3s638_22	127	MLCCAAESSFVSSETSDKIGTIQRRLAWPLRKDDTHKSRNGPDFFVPLSGSLNLPFAVCKVDLLFVTAVHKHCGRSGPLLHVYRARKQTGEGAISTKANVVWNVKVMCRGKKASMGEDVIWCGGEEG
SGF18	ORTHO05D009796	Physcomitrium patens	Pp3s677_10V3.1	Pp3s677_10	105	MLCCAAESSFVSSETSDKIGTIQRRLAWPLRKDDTHKSRNGPDFFVPLSGSLNLPFAVCKVDLLFVTAVHKHCGRSGPLLHVYRARKQTGEGAISTKANVVWNVK
SGF18	ORTHO05D009796	Physcomitrium patens	Pp3s677_11V3.1	Pp3s677_11	123	MDALLRVSEEVVRSIDPHGLKVDAWRVIWDGGRAVVHVSSETSDKIGTIQRRLAWPLRKDDTHKSRNGPNLFLFADLSLFLAFIACHVSRLGFLLITAAVHKRCSLLHHFCEGSSMFVEHQQI
SGF18	ORTHO05D009796	Physcomitrium patens	Pp3s677_20V3.1	Pp3s677_20	123	MDALLRVSEEVVRSIDPHGLKVDAWRVIWDGGRAVVHVSSETSDKIGTIQRRLAWPLRKDDTHKSRNGPNLFLFADLSLFLAFIACHVSRLGFLLITAAVHKRCSLLHHFCEGSSMFVEHQQI

## Sheet: deleted MpGenes
SGF ID	MpTak v3.1	MpTak v5.1	MpTak v5.2	MpTak v6.1
MpSGF3	Mapoly0071s0091	Mp5g15190	-	-
MpSGF5	Mapoly4316s0001	Mp2g20530	-	-
MpSGF15	Mapoly0065s0075	Mp1g23010	-	-
MpSGF16	Mapoly0060s0115	Mpzg00930	-	-
MpSGF16	Mapoly0152s0002	Mp6g09550	-	-
MpSGF16	Mapoly0047s0059	Mp6g14040	-	-
MpSGF16	Mapoly0047s0060	Mp6g14050	-	-
